## Delaying Mobility Disability in People With Parkinson Disease Using a Sensorimotor Agility Exercise Program

Laurie A King, Fay B Horak

LA King, PT, PhD, is Post-doctoral Fellow, Oregon Health and Sciences University, Portland, Oregon.

FB Horak, PT, PhD, is Research Professor of Neurology and Adjunct Professor of Physiology and Biomedical Engineering, Department of Neurology, Oregon Health and Sciences University, West Campus, Building 1, 505 NW 185th Ave, Beaverton, OR 97006-3499 (USA). Address all correspondence to Dr Horak at: horakf@ohsu.edu.

[King LA, Horak FB. Delaying mobility disability in people with Parkinson disease using a sensorimotor agility exercise program. *Phys Ther.* 2009;89:384–393.]

© 2009 American Physical Therapy Association

This article introduces a new framework for therapists to develop an exercise program to delay mobility disability in people with Parkinson disease (PD). Mobility, or the ability to efficiently navigate and function in a variety of environments, requires balance, agility, and flexibility, all of which are affected by PD. This article summarizes recent research identifying how constraints on mobility specific to PD, such as rigidity, bradykinesia, freezing, poor sensory integration, inflexible program selection, and impaired cognitive processing, limit mobility in people with PD. Based on these constraints, a conceptual framework for exercises to maintain and improve mobility is presented. An example of a constraint-focused agility exercise program, incorporating movement principles from tai chi, kayaking, boxing, lunges, agility training, and Pilates exercises, is presented. This new constraint-focused agility exercise program is based on a strong scientific framework and includes progressive levels of sensorimotor, resistance, and coordination challenges that can be customized for each patient while maintaining fidelity. Principles for improving mobility presented here can be incorporated into an ongoing or long-term exercise program for people with PD.

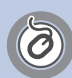

Post a Rapid Response or  
find The Bottom Line:  
[www.ptjournal.org](http://www.ptjournal.org)

Most people who are diagnosed with Parkinson disease (PD) do not consult with a physical therapist until they already have obvious mobility problems. However, it is possible that a rigorous exercise program that focuses on anticipated problems, which are inevitable with progression of the disease, may help patients who do not yet exhibit mobility problems. Although there are excellent guidelines for physical therapists to treat patients with PD who exhibit mobility problems in order to improve or maintain their mobility,<sup>1,2</sup> there is little research on whether exercise may delay or reduce the eventual mobility disability in patients diagnosed with PD.

The major cause of disability in people with PD is impaired mobility.<sup>3</sup> Mobility, the ability of a person to move safely in a variety of environments in order to accomplish functional tasks,<sup>4</sup> requires dynamic neural control to quickly and effectively adapt locomotion, balance, and postural transitions to changing environmental and task conditions. Such dynamic control requires sensorimotor agility, which involves coordination of complex sequences of movements, ongoing evaluation of environmental cues and contexts, the ability to quickly switch motor programs when environmental conditions change, and the ability to maintain safe mobility during multiple motor and cognitive tasks.<sup>5,6</sup> The types of mobility deficits inevitable with the progression of PD suggest

that the basal ganglia are critical for sensorimotor agility.<sup>2</sup> Critical aspects of mobility disability in people with PD, such as postural instability, are unresponsive to pharmacological and surgical therapies,<sup>7</sup> making preventative exercise an attractive option. As yet, there is no known ongoing exercise program for people diagnosed with PD that focuses on maintaining or improving their agility to slow or reduce their decline in mobility.

This article uses the known sensorimotor impairments of PD that affect balance, gait, and postural transitions to develop a conceptual framework to design exercises that aim to delay disability and maintain or improve mobility in people with PD. This framework is based on the current knowledge of the neurophysiology of PD and the inevitable constraints on mobility resulting from basal ganglia degeneration. The scientifically based principles presented here, which are focused on mobility disorders in people with PD, can be incorporated into an existing therapy program for people with PD.

Based on this framework, this article also presents an example of a novel sensorimotor agility program that we are currently testing in a clinical trial. This program is unique in that it encourages a partnership among physical therapists, exercise trainers, and patients to set up, progress, and re-evaluate an exercise program that ultimately can be carried out independently in the community. It is likely that a mobility program, such as the one presented here, would need to be sustained and modified throughout the course of the disease to maintain maximal benefit.

## Why Exercise May Prevent or Delay Mobility Disability in People With PD

Exciting new findings in neuroscience regarding the effects of exercise on neural plasticity and neuroprotection of the brain against neural degeneration suggest that an intense exercise program can improve brain function in patients with neurological disorders. Specifically, animal studies have demonstrated neurogenesis,<sup>8</sup> an increase in dopamine synthesis and release,<sup>9</sup> and increased dopamine in the striatum following acute bouts of exercise.<sup>10</sup> Such changes in the brain may affect behavioral recovery as a result of neuroplasticity (the ability of the brain to make new synaptic connections), neuroprotection, and slowing of neural degeneration.<sup>11,12</sup> Studies with parkinsonian rats have suggested that chronic exercise may help reverse motor deficits in animals by changing brain function. Specifically, rats that ran on a treadmill showed preservation of dopaminergic cell bodies and terminals<sup>11,13</sup> associated with improved running distance and speed,<sup>12</sup> indicating a neuroprotective effect of exercise. Conversely, nonuse of a limb induced by casting in parkinsonian rats increased motor deficits as well as loss of dopaminergic terminals.<sup>11</sup> Aerobic exercise, such as treadmill training and walking programs, has been tested in individuals with PD and has been shown to improve gait parameters, quality of life, and levodopa efficacy.<sup>14-16</sup> However, it is not clear whether aerobic training, by itself, is the best approach to improving *mobility*, which depends upon dynamic balance, dual tasking, negotiating complex environments, quick changes in movement direction, and other sensorimotor skills affected by PD. It is possible that treadmill training, for example, could be even more effective for addressing complex mobility issues for people with

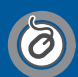

Available With  
This Article at  
[www.ptjournal.org](http://www.ptjournal.org)

• [Audio Abstracts Podcast](#)

*This article was published ahead of print on February 19, 2009, at [www.ptjournal.org](http://www.ptjournal.org).*

PD if the therapist could incorporate tasks such as dual tasking, balance training, and set-switching into a treadmill program.

There currently are many untested exercise programs available for people with PD<sup>17-19</sup> as well as several randomized controlled studies that test specific exercises, such as strength (force-generating capacity) training or gait training.<sup>20-29</sup> The approach presented in this article is focused on exercises that challenge sensorimotor control of dynamic balance and gait to improve mobility in people with PD. There are many other aspects of PD that also must be addressed in rehabilitation.

### Drive Neuroplasticity With Task-Specific Agility Exercise

Studies in rats have demonstrated that task-specific agility training (eg, acrobatic, environmental enrichment-type, high-beam balance course) results in larger improvements in motor skills as well as larger changes in synaptic plasticity than simple, repetitive aerobic training such as running on treadmills.<sup>30-35</sup> Task-specific exercise also has been shown to be more effective than aerobic or general exercise to improve task performance in patients with stroke.<sup>36,37</sup> Task-specific exercises targeted at a single, specific balance or gait impairment in patients with PD have been shown to be effective. For example, exercises targeted at improving small step size, poor axial mobility, difficulty with postural transitions, small movement amplitude, or slow speed of compensatory stepping have individually been shown to be effective in improving each particular aspect of mobility.<sup>18,22,38-42</sup> We have borrowed singular techniques from several successful programs and combined them with task-specific components of mobility and systematic sensorimotor

challenges into a comprehensive exercise program directed at delaying and reducing mobility problems in individuals with PD.

### Reduce Mobility Constraints With Exercise

People with mild or newly diagnosed PD often do not have obvious muscle weakness or poor balance.<sup>43</sup> Nevertheless, the literature suggests that muscle weakness, secondary to abnormal muscle activation associated with bradykinesia and rigidity, can be present at all stages of PD.<sup>44-47</sup> Similarly, balance and mobility problems may be present in people with mild PD but only become apparent when more-complex coordination is required under challenging conditions.<sup>48,49</sup> For example, mobility problems may only be apparent when an individual with PD is attempting to walk quickly in a cluttered environment while talking on a cell phone. As the disease progresses, balance problems become more apparent, just as patients begin to show impaired kinesthesia and inability to quickly change postural strategies.<sup>50,51</sup> The basal ganglia affect balance and gait by contributing to automaticity, self-initiated gait and postural transitions, changing motor programs quickly, sequencing actions, and using proprioceptive information for kinesthesia and multi-segmental coordination.<sup>52-54</sup> During the progression of PD, mobility is progressively constrained by rigidity, bradykinesia, freezing, sensory integration, inflexible motor program selection, and attention and cognition.<sup>2</sup> Table 1 summarizes constraints on mobility due to PD, the impact of these constraints on mobility, and the goals of exercises that could potentially reduce the impact of each constraint.

### Constraints Affecting Mobility in People With PD, With Implications for the Sensorimotor Agility Program

#### Rigidity

Parkinsonian rigidity is characterized by an increased resistance to passive movement throughout the entire range of motion, in both agonist and antagonist muscle groups.<sup>55-57</sup> The functional outcomes of rigidity, in general, include a flexed posture,<sup>58</sup> lack of trunk rotation,<sup>59,60</sup> and reduced joint range of movement during postural transitions and gait.<sup>56,61</sup> Electromyography studies have shown that people with PD have high tonic background activity, especially in the flexors, and co-contraction of muscles during movement, especially in the axial muscles.<sup>56,57</sup> In addition, antagonist muscle activation is larger and earlier, resulting in coactivation of muscle groups during automatic postural responses.<sup>61</sup>

Another characteristic of parkinsonian rigidity is axial rigidity, which results in a loss of natural vertebral, pelvis/shoulder girdle, and femur/pelvis flexibility and range of motion that accompanies efficient postural and locomotor activities.<sup>60,62</sup> Wright et al<sup>55</sup> found that rigidity in the neck, torso, and hips of standing subjects was 3 to 5 times greater in subjects with PD than in age-matched control subjects when measuring the torsional resistance to passive movement along the longitudinal axis during twisting movements. Levodopa medication did not improve their axial rigidity.<sup>55</sup> The high axial tone (velocity-dependent resistance to stretch) in patients with PD contributes to their characteristic “en bloc” trunk motions, which make it difficult for them to perform activities such as rolling over in bed or turning while walking.<sup>62</sup>

**Table 1.**

Parkinsonian Constraints Affecting Mobility and Exercise Principles Designed to Reduce These Constraints<sup>a</sup>

| Constraints                                                | Impact on Mobility                                                                                                                                         | Exercise Principles                                                                                                                    |
|------------------------------------------------------------|------------------------------------------------------------------------------------------------------------------------------------------------------------|----------------------------------------------------------------------------------------------------------------------------------------|
| I. Rigidity                                                | Agonist/antagonist co-contraction<br>Flexed alignment of trunk<br>Reduced trunk rotation<br>Reduced joint range of movement<br>High axial tone (stiffness) | Trunk rotation<br>Reciprocal movements<br>Rhythmic movements<br>Erect alignment<br>Large CoM movements<br>Increase limits of stability |
| II. Bradykinesia                                           | Slow, small movements<br>Narrow base of support<br>Lack of arm swing                                                                                       | Fast, large steps<br>CoM control<br>Large arm swings                                                                                   |
| III. Freezing                                              | Poor anticipatory postural adjustments<br>Abnormal mapping of body and movement<br>Abnormal visual-spatial maps<br>Divided attention affects mobility      | Improve weight shifting<br>Understand role of external cues<br>Exercise in small spaces<br>Practice dual tasks                         |
| IV. Inflexible program selection (sequential coordination) | Poor rolling, sit-to-stand maneuvers, turns<br>Difficult floor transfers<br>Inability to change strategy quickly                                           | Plan task in advance<br>Quick change strategies<br>Sequencing components of task                                                       |
| V. Impaired sensory integration                            | Inaccurate without vision<br>Imbalance on unstable surface<br>Poor alignment with environment                                                              | Kinesthetic awareness<br>Decrease surface dependence<br>Flexible orientation                                                           |
| VI. Reduced executive function and attention               | Difficulty with dual tasks and sequences of actions                                                                                                        | Practice gait and balance with secondary task and sequences of actions (ie; boxing, agility course)                                    |

<sup>a</sup> CoM=center of mass.

Schenkman et al<sup>63</sup> showed that exercise can increase trunk flexibility in people with PD. We propose an agility program that includes movements that minimize agonist-antagonist muscle co-contraction (ie, reciprocal movements), promote axial rotation, lengthen the flexor muscles, and strengthen the extensor muscles to promote an erect posture. Rigidity can potentially be addressed with kayaking, an exercise in which the person counter-rotates the shoulder and pelvic girdle; tai chi, a set of exercises that focuses on the individual's awareness of postural alignment during postural transitions; and pre-Pilates, a series of exercises aimed at increasing spinal mobility and lengthening flexor muscles groups. In addition, the program should include strategies for turning and transitioning from a standing position to sitting on the floor and back again that emphasize trunk and head rotation (Tabs. 2 and 3).<sup>18</sup>

### Bradykinesia

Bradykinesia is most commonly defined as slowness of voluntary movement,<sup>43</sup> but it also is associated with slow and weak postural responses to perturbations and anticipatory postural adjustments. Reactive postural responses to surface translations<sup>61,64</sup> and anticipatory postural movements prior to rising onto toes<sup>65</sup> and prior to step initiation<sup>66</sup> are bradykinetic in patients with PD. Bradykinetic voluntary stepping and postural compensatory stepping are characterized by a delayed time to lift the swing limb, a weak push-off, reduced leg lift, a small stride length, and lack of arm swing.<sup>61,64,66,67</sup> Bradykinesia also is apparent in reduced voluntary and reactive limits of stability, especially in the backward direction.<sup>64,68</sup> The characteristic narrow stance of patients with PD may be compensatory for bradykinetic anticipatory postural adjustments prior to a step, at the expense of reduced lateral postural stability.<sup>67,69</sup> Bradykinetic postural

responses in people with PD generally are not improved by antiparkinsonian medications, highlighting the need for an exercise approach to this constraint on mobility.<sup>6</sup> Bradykinesia also is seen in postural transitions such as turning<sup>70</sup> and the supine-to-stand maneuver,<sup>59</sup> as well as in single-joint movements<sup>71</sup> and multi-joint reaching movements<sup>72</sup> in people with PD.

Bradykinesia is evident in slowed rate of increase and decrease of muscle activation patterns.<sup>73</sup> Reduction in muscle strength in people with PD has been attributed primarily to reduced cortical drive to muscles because voluntary contraction, but not muscle response to nerve stimulation, is weak in these individuals.<sup>74,75</sup> Electromyographic activity in bradykinetic muscles often is fractionated into multiple bursts and is not well scaled for changes in movement distance or velocity.<sup>71</sup> Years of bradykinesia from abnormal, centrally driven muscle control and abnormal, inefficient pat-

## A Sensorimotor Agility Exercise Program for People With Parkinson Disease

**Table 2.**

Representative Agility Exercise Program, With Progressions

| Exercise                                                                                                                                       | Actions                                                                                                                                                                                                                                                                                                                                                                                                   | Progressions                                                                                                                          |
|------------------------------------------------------------------------------------------------------------------------------------------------|-----------------------------------------------------------------------------------------------------------------------------------------------------------------------------------------------------------------------------------------------------------------------------------------------------------------------------------------------------------------------------------------------------------|---------------------------------------------------------------------------------------------------------------------------------------|
| I. Tai chi: Increase limits of stability, improve perception of posture and coordination of arms and legs and backward and lateral large steps | Prayer wheel: anterior-posterior slow, rhythmical weight shifts coordinated with large arm circles<br>Cat walk: slow and purposeful steps, with diagonal weight shifts<br>Cloud hands: slow lateral steps, with trunk vertical<br>Part the wild horse's mane: coordination of arms and legs while walking forward<br>Repulsing the monkey: deliberate slow, backward walking, with diagonal weight shifts | Learn one action per week, starting with weight shifting and leg placement and progressing to coordinated arm, neck, and torso motion |
| II. Kayaking: Trunk rotation, segmental coordination, speed                                                                                    | Kayaking stroke: diagonal trunk rotation, with reciprocal forward arm extension and backward arm retraction                                                                                                                                                                                                                                                                                               | Speed, surface, resistance, vision, dual task                                                                                         |
| III. Agility course: Agility, multisegmental coordination, quick changes in direction, and mobility in tight spaces                            | High knees: high-amplitude stepping, with hand slapping knees<br>Lateral shuffle: quick, lateral steps<br>Tire course: wide-based, quick and high steps, with turns<br>Grapevine cross: over coordinated steps                                                                                                                                                                                            | Speed, dual task, quick change in directions, tight and cluttered spaces, vision                                                      |
| IV. Boxing: Anticipatory postural adjustments, postural corrections, fast arm and foot motions, backward walking, timing, sequencing actions   | Jab: short, straight punch from shoulder<br>Cross: power punch, with trunk rotation, leading arm crosses midline<br>Hook: short, lateral punch, with elbow bent and wrist twisted inward, trunk rotation<br>Combinations: 2 or more punches delivered quickly after one another                                                                                                                           | Speed, dual task, walking forward, walking backward, turns, remembered sequences of action                                            |
| V. Lunges: Big steps, stepping for postural correction, limits of stability, quick changes in direction, internal representation of body       | Postural correction: lean until center of mass is outside base of support, requiring a step; all directions<br>Single multidirectional steps (clock stepping)<br>Dynamic multidirectional lunge walking                                                                                                                                                                                                   | Surface (up and down stool), external cues, vision, resistance, dual task (add arm movements or cognitive task)                       |
| VI. Pre-Pilates: Improve trunk control, axial rotation and extension, functional transitions, sequencing actions                               | Cervical range of motion, sit-to-stand maneuver<br>Floor transfer, supine (bridging)<br>Rolling (prone lying, progress to spinal extension exercises)<br>Quadruped (bird-dog, cat-camel, thread the needle)<br>Half-kneeling to stand                                                                                                                                                                     | Improve form and speed                                                                                                                |

terns of muscle recruitment limit functional mobility and eventually may result in focal muscle weakness.

Because bradykinesia is due to impaired central neural drive, rehabilitation to reduce bradykinesia should focus on teaching patients to increase the speed, amplitude, and temporal pacing of their self-initiated and reactive limb and body center-of-mass (CoM) movements. Table 2 presents representative exercises aimed at reducing bradykinesia for mobility. These exercises may promote weight-shift control and postural adjustments in anticipation of voluntary movements such as

lunges, kicks, and quick boxing movements. Patients also practice taking large, protective steps while tilting past their limits of stability and in response to external displacements associated with hitting or punching a boxing bag. To reduce bradykinesia, patients should be encouraged to “think big”<sup>42</sup> while increasing the speed and amplitude of large arm and leg movements throughout agility courses and during multidirectional lunges and boxing (Tabs. 2 and 3). Walking sticks may help patients attend to the large, symmetrical arm swing that is coordinated with strides during gait.

### Freezing

Freezing of gait manifests as a movement hesitation in which a delay or complete inability to initiate a step occurs.<sup>76</sup> Freezing not only slows walking, but it also is a major contributor to falls in people with PD.<sup>77</sup> It is a poorly understood phenomenon that is associated with executive disorders in people with PD.<sup>76,78</sup> Freezing during gait occurs more often when a person is negotiating a crowded environment or narrow doorway, when making a turn, or when attention is diverted by a secondary task.<sup>77,79</sup> Jacobs and Horak<sup>80</sup> recently found that freezing or “start hesitation” in step initiation is asso-

**Table 3.**  
Progressions for Each Activity

| <b>A. Kayaking: Kayaking focuses on counter-rotation of shoulder and pelvic girdle and axial trunk rotation.</b>                                                                                                                                                                                                      |                                                   |                                         |                                     |                                                    |                                                  |                                        |
|-----------------------------------------------------------------------------------------------------------------------------------------------------------------------------------------------------------------------------------------------------------------------------------------------------------------------|---------------------------------------------------|-----------------------------------------|-------------------------------------|----------------------------------------------------|--------------------------------------------------|----------------------------------------|
| Level                                                                                                                                                                                                                                                                                                                 | Surface                                           | Vision                                  | Resistance                          | Dual Task                                          |                                                  |                                        |
| 1                                                                                                                                                                                                                                                                                                                     | Sit on a chair                                    | Normal, well-lit room                   | Holding pole                        | Counting                                           |                                                  |                                        |
| 2                                                                                                                                                                                                                                                                                                                     | Sit on DynaDisc <sup>a</sup>                      | Sunglasses                              | 3-lb pole                           | Verbal: make a list                                |                                                  |                                        |
| 3                                                                                                                                                                                                                                                                                                                     | Stand on firm surface                             | No-body glasses                         | 6-lb pole                           | Verbal/cognitive: math                             |                                                  |                                        |
| <b>B. Agility course: The agility course includes turns, doorways, hallways, and small areas. The tasks include high knees walking with hands touching knees, skipping, lateral shuffles, grapevine, and tire course. Advanced individuals may add agility on an inclined surface and bouncing or tossing a ball.</b> |                                                   |                                         |                                     |                                                    |                                                  |                                        |
| Level                                                                                                                                                                                                                                                                                                                 | Speed/Agility                                     |                                         | Dual Task                           |                                                    | Arms and Trunk (High Knees and Tire Course Only) |                                        |
| 1                                                                                                                                                                                                                                                                                                                     | Self-paced                                        |                                         | Count steps out loud                |                                                    | Self-selected                                    |                                        |
| 2                                                                                                                                                                                                                                                                                                                     | Increase speed                                    |                                         | Motor task: toss ball between hands |                                                    | Reciprocal arms                                  |                                        |
| 3                                                                                                                                                                                                                                                                                                                     | Quick changes in direction, pace, stop and go     |                                         | Cognitive task: math                |                                                    | Add head and trunk rotation                      |                                        |
| <b>C. Boxing: The boxing task includes simple to complex combinations involving jabs, hooks, and crosses.</b>                                                                                                                                                                                                         |                                                   |                                         |                                     |                                                    |                                                  |                                        |
| Level                                                                                                                                                                                                                                                                                                                 | Plane of Movement                                 | Speed                                   |                                     | Dual Task                                          |                                                  |                                        |
| 1                                                                                                                                                                                                                                                                                                                     | Lateral stance to the bag                         | Self-paced                              |                                     | Count punches                                      |                                                  |                                        |
| 2                                                                                                                                                                                                                                                                                                                     | Pivot with back foot                              | Bursts of speed: combo punches for 15 s |                                     | Name punches (hook, jab, cross)                    |                                                  |                                        |
| 3                                                                                                                                                                                                                                                                                                                     | Walk backward around bag                          | Bursts of speed: combo punches for 30 s |                                     | Cognitive task while maintaining pattern           |                                                  |                                        |
| <b>D. Lunges: Three types of lunges use these progressions: (1) lunges for postural correction, (2) clock stepping (multidirectional, in-place) lunges, and (3) dynamic lunges during locomotion.</b>                                                                                                                 |                                                   |                                         |                                     |                                                    |                                                  |                                        |
| Level                                                                                                                                                                                                                                                                                                                 | Surface                                           | External Cue                            | Vision                              | Resistance                                         | Dual Task                                        | Arms and Trunk (Dynamic Lunges Only)   |
| 1                                                                                                                                                                                                                                                                                                                     | Firm surface                                      | Rubber discs designate foot placement   | Well-lit room                       | None                                               | None                                             | None                                   |
| 2                                                                                                                                                                                                                                                                                                                     | One foot on compliant surface (DynaDisc/foam mat) | Decrease disc size or number            | Sunglasses                          | Weight vest (start with 10% of body weight)        | Motor task: trunk                                | Use arms reciprocally                  |
| 3                                                                                                                                                                                                                                                                                                                     | Foam mat (both feet)                              | No discs                                | No-body glasses                     | Increase vest weight, 5% of body weight increments | Verbal or cognitive                              | Lift arms over head while holding ball |

<sup>a</sup> DynaDisk manufactured by Exertools Inc, 320 Professional Center Dr, #100, Rohnert Park, CA 94928.

ciated with repetitive, anticipatory, lateral weight shifts and that people who are healthy can be made to “freeze” when they do not have time to preplan which foot to use when initiating a compensatory or voluntary step. Therefore, freezing may be related to difficulties in shifts of attention, preplanning movement strategies, or quickly selecting a correct central motor program.

To help people in the early stages of PD reduce their chances of being

affected by freezing, agility exercises should be performed in environments in which freezing typically occurs. As shown in Tables 2 and 3, exercises that involve high stepping, skipping, or taking large steps in different directions through doorways and over and around obstacles, such as between chairs placed shoulder-width apart, could potentially reduce freezing episodes. Quick turns should be practiced in corners and near walls. Individuals with PD could perform these exercises in the home

or gym, where obstacle courses have been set up that require turning quickly, negotiating narrow and tight spaces such as corners, ducking under and stepping over obstacles, picking up objects while walking, and quickly changing directions and foot placement. Once a person successfully performs the agility exercises on an obstacle course, more-advanced progressions could be introduced, such as performing dual cognitive tasks while maintaining form and speed on agility tasks.

### Inflexible Program Selection and Poor Sequential Coordination

Research suggests that the basal ganglia play an important role in task switching, motor program selection, and suppression of irrelevant information before executing an action.<sup>52</sup> The inability to quickly switch motor programs has been demonstrated in individuals with PD by an inability to change postural response synergies in the first perturbation trial after a change in support, change in instructions, or change in perturbation direction.<sup>51,81</sup> Dopamine replacement does not improve inflexible program selection.<sup>82,83</sup> The difficulty with switching motor programs manifests in difficulty maneuvering in new and challenging environments and in changes in postural transitions, such as turning, standing from a sitting position, and rolling over.<sup>84</sup> In addition to difficulty switching motor programs, people with PD have difficulty sequencing motor actions.<sup>65,85,86</sup> Patients with PD show a delay between their anticipatory postural adjustments and voluntary movements, such as rising onto toes<sup>65</sup> or a voluntary step.<sup>66</sup> These findings suggest that mobility in people with PD is constrained by poor coordination among body parts and between voluntary movements and their associated postural adjustments, as well as by difficulty in switching motor programs appropriate for changes in task constraints.

Consequently, an exercise program should include complex, multisegmental, whole-body movements and should include tasks requiring quick selection and sequencing of motor programs such as practicing postural transitions (eg, moving from stance to the floor, rolling, and arising from the floor to stance). As shown in Table 2, one such exercise approach is tai chi, which helps patients to learn increasingly complex sequences of movement and to focus on smooth timing and synchroniza-

tion of whole-body movements. Incorporating boxing actions into a remembered sequence is another way to practice the quick selection and sequencing of complex motor programs for mobility. To address problems of quick program selection, lunges and agility exercises also provide practice changing motor strategies during stopping, starting, changing direction, changing stepping limb, and changing the size and placement of steps.

### Sensory Integration

There is strong evidence that the basal ganglia are critical for high-level integration of somatosensory and visual information necessary to form an internal representation of the body and the environment.<sup>87,88</sup> Despite clinical examinations of patients with PD revealing only inconsistent, subtle signs of abnormal sensory perception,<sup>89,90</sup> an increasing number of studies are showing abnormal kinesthesia and use of proprioception in people with PD. For example, Wright et al<sup>55</sup> and Horak et al<sup>64</sup> found that individuals with PD have an impaired ability to detect the rotation of a surface or the passive rotation of the torso and that this poor kinesthesia is worsened by levodopa medication. Individuals with PD also show impaired perception of arm position and movement and decreased response to muscle vibration.<sup>91-93</sup> The poor use of proprioceptive information and decreased perception of movement are associated with over-estimation of body motion (bradykinesia) and over-dependence on vision.<sup>50,94</sup>

To facilitate use of proprioceptive information and reduce over-reliance on vision, an agility program should progress balancing and walking tasks by: (1) wearing dark sunglasses to reduce visual contrast sensitivity and (2) use of “no body” glasses to obscure the bottom half of the visual field so the body cannot be

seen. In addition, many of the exercises can be performed on a variety of surfaces to require adaptation to altered somatosensory information from the surface. External feedback and sensory cues from the therapist regarding quality and size of the movements should be used initially and progressively decreased as patients develop a more accurate internal sense of body position. As shown in Table 3, the sensorimotor agility program used as an example in this article progresses with traditional progressive challenges<sup>95</sup> (increasing resistance, speed of gait, endurance, and so on) and with sensorimotor challenges (dual tasking and changes in base of support, visual input, and surface conditions).

### Cognitive Constraints

The inability to simultaneously carry out a cognitive task and a balance or walking task has been found to be a predictor of falls in elderly people.<sup>96</sup> It is even more difficult for a person with PD than age-matched elderly people to perform multiple tasks,<sup>86</sup> possibly because the basal ganglia are responsible for allowing automatic control of balance and gait and for switching attention between tasks.<sup>52,86</sup> Postural sway increases most in individuals with PD who have a history of falls when a cognitive task is added to the task of quiet stance.<sup>97</sup> These findings suggest that the ability to carry out a secondary cognitive or motor tasks while walking or balancing is a critical element of mobility that is a particular challenge in people with PD.

An agility program could progress task difficulty by adding cognitive or motor tasks that teach patients with PD to maintain postural stability during performance of secondary tasks. Table 3 presents exercises in which it is safe and appropriate to add a dual cognitive or motor task. The exercises at level 1 have no dual tasks, level 2 has a motor task (eg,

bouncing a ball) added to the basic exercise such as an agility course, and level 3 has a cognitive task (eg, performing math or memory problems) added to the same basic exercise. The progression of adding secondary tasks to gait and balance tasks serves as a training device as well as a tool to help patients understand the relationship between safe mobility and secondary tasks in everyday life.

## A Sensorimotor Agility Program for People With PD

In this article, we propose a novel sensorimotor agility program targeted at constraints on mobility in people with PD. The expertise that contributed to the program includes an internationally recognized neurologist specializing in movement disorders for more 35 years and 5 physical therapists experienced in treating people with PD, including 3 with PhDs with a focus on PD. Six certified athletic trainers who regularly work with people with PD also were helpful in designing the program. We propose that the exercise program outlined in Table 2 could last 60 minutes, with about 10 minutes for each category of exercise. The exercises in the 6 categories were selected to target one or more of the constraints on mobility (Tab. 1).

Although not all people with PD have all of the constraints addressed in this article, it may be that exercise should target all of these constraints, as each constraint generally is associated with the progression of PD and eventually has a marked effect on mobility. Addressing constraints early may delay the onset of related mobility deficits. Category I, “tai chi,” is a whole-body exercise that focuses on developing a sense of body kinesthesia, improving postural alignment, and sequencing of whole-body movements that move the CoM. Category II, “kayaking,” focuses on trunk and

cervical rotation and speed, with large, coordinated arm movements. Category III, “agility course,” focuses on quickly changing motor programs such as quick turns, sequencing actions, and overcoming freezing. Category IV, “boxing,” focuses on building the patient’s agility and speed, backward walking, and components of anticipatory and reactive postural adjustments in response to a moving bag. Category V, “lunges,” helps patients with PD practice large CoM movements, multidirectional limits of stability, and steps for postural correction. Category VI, “pre-Pilates,” is a set of exercises that help patients with PD extend and strengthen the spine, as well as practice postural transitions such as sit-to-stand maneuvers, floor transfers, and rolling.<sup>18</sup>

The sensorimotor progressions of exercises II through V follow 3 levels of difficulty (Tab. 3). Progressions include: (1) reducing the base of support, (2) increasing surface compliance to reduce surface somatosensory information for postural orientation, (3) increasing speed or resistance with weights, (4) adding secondary cognitive tasks to automate posture and gait, and (5) limiting visual input of the body with “no body” glasses or of the environment with dark sunglasses to increase use of kinesthetic information. Category I (tai chi) and category VI (pre-Pilates) exercises progress by increasing the length of remembered sequences and improving the form of each subcomponent of the movements. All of these sensorimotor progressions were chosen specifically to target the predictable constraints on mobility due to PD, and testing of the program is currently under way.

## Summary

We present a progressive sensorimotor agility exercise program for prevention of mobility disability in people with PD. The program is based on the role of the basal ganglia in

posture and gait, the principles of neural plasticity, and the inevitable constraints of PD that ultimately affect dynamic balance and mobility. These principles of the program include a focus on self-initiated movements, big and quick movements, large and flexible CoM control, reciprocal and coordinated movements of arms and legs, and rotational movements of torso over pelvis and pelvis over legs. Flexible, rotational axial motion of trunk and neck are stressed to achieve erect postural alignment, strengthening of extensors, and lengthening of flexors. Our program is designed to facilitate sensory integration for balance, emphasizing the use of somatosensory information to move the body’s CoM quickly and effectively for balance and mobility. Secondary cognitive tasks are added to mobility tasks to automatize control of balance and gait. This sensorimotor agility approach to mobility training is intended for prevention of mobility disability but may be modified for patients at later stages of PD progression to improve their mobility.

Both authors provided concept/idea/project design, writing, and project management. Dr Horak provided fund procurement, facilities/equipment, institutional liaisons, and consultation (including review of manuscript before submission).

The exercise program developed out of brainstorming sessions with the following expert neurologists, scientists, physical therapists, and trainers: Fay B Horak, PT, PhD, Jay Nutt, MD, Laurie A King, PT, PhD, Sue Scott, CT, Andrea Serdar, PT, CNS, Chad Swanson, CT, Valerie Kelly, PT, PhD, Ashley Scott, CT, David Vecto, CT, Triana Nagel-Nelson, CT, Kimberly Berg, CT, Nandini Deshpande, PT, PhD, and Cristiane Zampieri, PT, PhD. Strawberry Gatts, PhD, provided expert advice to select and modify tai chi moves for people with Parkinson disease.

This work was supported by a grant from the Kinetics Foundation and by a grant from the National Institute on Aging (AG006457).

Dr Horak was a consultant for the Kinetics Foundation. This potential conflict of interest



## A Sensorimotor Agility Exercise Program for People With Parkinson Disease

has been reviewed and managed by Oregon Health and Sciences University.

This article was received July 11, 2008, and was accepted January 12, 2009.

DOI: 10.2522/ptj.20080214

### References

- 1 Keus SH, Bloem BR, Hendriks EJ, et al. Evidence-based analysis of physical therapy in Parkinson's disease with recommendations for practice and research. *Mov Disord.* 2007;22:451-460.
- 2 Morris ME. Movement disorders in people with Parkinson disease: a model for physical therapy. *Phys Ther.* 2000;80:578-597.
- 3 Wood BH, Bilclough JA, Bowron A, Walker RW. Incidence and prediction of falls in Parkinson's disease: a prospective multidisciplinary study. *J Neurol Neurosurg Psychiatry.* 2002;72:721-725.
- 4 Patla AE, Shumway-Cook A. Dimensions of mobility: defining the complexity and difficulty associated with community mobility. *J Aging Phys Act.* 1998;7:7-19.
- 5 Shumway-Cook A, Woollacott M. *Motor Control: Theory and Practical Applications.* Baltimore, MD: Williams & Wilkins; 1995.
- 6 Horak FB, Macpherson MJ. Postural orientation and equilibrium. In: Rowell LB, Shepherd JR, eds. *Handbook of Physiology, Section 12: Exercise: Regulation and Integration of Multiple Systems.* New York, NY: Oxford University Press; 1996: 255-292.
- 7 Bloem BR, van Vugt JP, Beckley DJ. Postural instability and falls in Parkinson's disease. *Adv Neurol.* 2001;87:209-223.
- 8 van Praag H, Kempermann G, Gage FH. Running increases cell proliferation and neurogenesis in the adult mouse dentate gyrus. *Nat Neurosci.* 1999;2:266-270.
- 9 Heyes MP, Garnett ES, Coates G. Nigrostriatal dopaminergic activity is increased during exhaustive exercise stress in rats. *Life Sci.* 1988;42:1537-1542.
- 10 Meeusen R, De Meirleir K. Microdialysis as a method to measure central catecholamines during exercise. *Med Sci Sports Exerc.* 1994;26:S23.
- 11 Tillerson JL, Cohen AD, Caudle WM, et al. Forced nonuse in unilateral parkinsonian rats exacerbates injury. *Neuroscience.* 2002;22:6790-6799.
- 12 Fisher BE, Petzinger GM, Nixon K, et al. Exercise-induced behavioral recovery and neuroplasticity in the 1-methyl-4-phenyl-1,2,3,6-tetrahydropyridine-lesioned mouse basal ganglia. *J Neurosci Res.* 2004; 77:378-390.
- 13 Tillerson JL, Caudle WM, Reveron ME, Miller GW. Exercise induced behavioral recovery and attenuates neurochemical deficits in rodent models of Parkinson's disease. *Neuroscience.* 2003;119:899-911.
- 14 Herman T, Giladi N, Gruendlinger L, Hausdorff JM. Six weeks of intensive treadmill training improves gait and quality of life in patients with Parkinson's disease: a pilot study. *Arch Phys Med Rehabil.* 2007; 88:1154-1158.
- 15 van Eijkeren FJ, Reijmers RS, Kleinveld MJ, et al. Nordic walking improves mobility in Parkinson's disease. *Mov Disord.* 2008; 23:2239-2243.
- 16 Muhlack S, Welnic J, Woitalla D, Muller T. Exercise improves efficacy of levodopa in patients with Parkinson's disease. *Mov Disord.* 2007;22:427-430.
- 17 Cianci H. *Parkinson's Disease: Fitness Counts.* 3rd ed. Miami, FL: National Parkinson Foundation; 2006.
- 18 Argue J. *Parkinson's Disease and the Art of Moving.* Oakland, CA: New Harbinger Publications; 2000.
- 19 Zid D. *Delay the Disease: Exercise and Parkinson's Disease.* Columbus, OH: Columbus Health Works Production; 2007.
- 20 Palmer SS, Mortimer JA, Webster DD, et al. Exercise therapy for Parkinson's disease. *Arch Phys Med Rehabil.* 1986;67: 741-745.
- 21 Comella CL, Stebbins GT, Brown-Toms N, Goetz CG. Physical therapy and Parkinson's disease: a controlled clinical trial. *Neurology.* 1994;44(3 pt 1):376-378.
- 22 Schenkman M, Cutson TM, Kuchibhatla M, et al. Exercise to improve spinal flexibility and function for people with Parkinson's disease: a randomized controlled trial. *J Am Geriatr Soc.* 1998;46:1207-1216.
- 23 Hirsch MA, Toole T, Maitland CG, Rider RA. The effects of balance training and high-intensity resistance training on persons with idiopathic Parkinson's disease. *Arch Phys Med Rehabil.* 2003;84: 1109-1117.
- 24 Ellis T, de Goede CJ, Feldman RG, et al. Efficacy of physical therapy program in patients with Parkinson's disease: a randomized controlled trial. *Arch Phys Med Rehabil.* 2005;86:626-632.
- 25 Protas EJ, Mitchell K, Williams A, et al. Gait and step training to reduce falls in Parkinson's disease. *NeuroRehabilitation.* 2005; 20:183-190.
- 26 Burini D, Farabollini B, Iacucci S, et al. A randomized controlled cross-over trial of aerobic training versus Qigong in advanced Parkinson's disease. *Eura Medico-phys.* 2006;42:231-238.
- 27 Dibble LE, Hale TF, Marcus RL, et al. High-intensity resistance training amplifies muscle hypertrophy and functional gains in persons with Parkinson's disease. *Mov Disord.* 2006;21:1444-1452.
- 28 Schmitz-Hubsch T, Pyfer D, Kielwein K, et al. Qigong exercise for the symptoms of Parkinson's disease: a randomized, controlled pilot study. *Mov Disord.* 2006; 21:543-548.
- 29 Ashburn A, Fazakarley L, Ballinger C, et al. A randomized controlled trial of a home based exercise programme to reduce the risk of falling among people with Parkinson's disease. *J Neurol Neurosurg Psychiatry.* 2007;78:678-684.
- 30 Schmidt RA. *Motor Control and Learning: A Behavioral Emphasis.* Champaign, IL: Human Kinetics Inc; 1982.
- 31 Chu CJ, Jones TA. Experience-dependent structural plasticity in cortex heterotopic to focal sensorimotor cortical damage. *Exp Neurol.* 2000;166:403-414.
- 32 Isaacs KR, Anderson BJ, Alcantara AA, et al. Exercise and the brain: angiogenesis in the adult rat cerebellum after vigorous physical activity and motor skill learning. *J Cereb Blood Flow Metab.* 1992;12:110-119.
- 33 Colcombe S, Kramer AF. Fitness effects on the cognitive function of older adults: a meta-analytic study. *Psychol Sci.* 2003; 14:125-130.
- 34 Black JE, Isaacs KR, Anderson BJ, et al. Learning causes synaptogenesis, whereas motor activity causes angiogenesis, in cerebellar cortex of adult rats. *Proc Natl Acad Sci USA.* 1990;87:5568-5572.
- 35 Anderson BJ, Alcantara AA, Greenough WT. Motor-skill learning: changes in synaptic organization of the rat cerebellar cortex. *Neurobiol Learn Mem.* 1996;66: 221-229.
- 36 Sullivan KJ, Brown DA, Klassen T, et al. Effects of task-specific locomotor and strength training in adults who were ambulatory after stroke: results of the STEPS randomized clinical trial. *Phys Ther.* 2007; 87:1580-1602; discussion 1603-1587.
- 37 Wolf SL, Winstein CJ, Miller JP, et al. Retention of upper limb function in stroke survivors who have received constraint-induced movement therapy: the EXCITE randomized trial. *Lancet Neurol.* 2008; 7:33-40.
- 38 Morris M, Ianssek R, Matyas TA, Summers JJ. Stride length regulation in Parkinson's disease normalization strategies and underlying mechanisms. *Brain.* 1996;119: 551-568.
- 39 Viliiani T, Pasquetti P, Magnolfi S, et al. Effects of physical training on straightening-up processes in patients with Parkinson's disease. *Disabil Rehabil.* 1999;21:68-73.
- 40 Mak MK, Hui-Chan CW. Cued task-specific training is better than exercise in improving sit-to-stand in patients with Parkinson's disease: a randomized controlled trial. *Mov Disord.* 2008;23:501-509.
- 41 Jobges M, Heuschkel G, Pretzel C, et al. Repetitive training of compensatory steps: a therapeutic approach for postural instability in Parkinson's disease. *J Neurol Neurosurg Psychiatry.* 2004;75:1682-1687.
- 42 Farley BG, Koshland GF. Training BIG to move faster: the application of the speed-amplitude relation as a rehabilitation strategy for people with Parkinson's disease. *Exp Brain Res.* 2005;167:462-467.
- 43 Melnick M. *Neurologic Rehabilitation.* 3rd ed. St Louis, MO: Mosby; 1995.
- 44 Wierzbicka MM, Wiegner AW, Logigian EL, Young RR. Abnormal most-rapid isometric contractions in patients with Parkinson's disease. *J Neurol Neurosurg Psychiatry.* 1991;54:210-216.
- 45 Stelmach GE, Teasdale N, Phillips J, Worringham CJ. Force production characteristics in Parkinson's disease. *Exp Brain Res.* 1989;76:165-172.

- 46 Corcos DM, Chen CM, Quinn NP, et al. Strength in Parkinson's disease: relationship to rate of force generation and clinical status. *Ann Neurol*. 1996;39:79-88.
- 47 Inkster LM, Eng JJ, MacIntyre DL, Stoessel AJ. Leg muscle strength is reduced in Parkinson's disease and relates to the ability to rise from a chair. *Mov Disord*. 2003;18:157-162.
- 48 Carpinella I, Crenna P, Calabrese E, et al. Locomotor function in the early stage of Parkinson's disease. *IEEE Trans Neural Syst Rehabil Eng*. 2007;15:543-551.
- 49 Rochester L, Hetherington V, Jones D, et al. Attending to the task: interference effects of functional tasks on walking in Parkinson's disease and the roles of cognition, depression, fatigue, and balance. *Arch Phys Med Rehabil*. 2004;85:1578-1585.
- 50 Maschke M, Gomez CM, Tuite PJ, Konczak J. Dysfunction of the basal ganglia, but not the cerebellum, impairs kinaesthesia. *Brain*. 2003;126(pt 10):2312-2322.
- 51 Chong RK, Horak FB, Woollacott MH. Parkinson's disease impairs the ability to change set quickly. *J Neurol Sci*. 2000;175:57-70.
- 52 Yehene E, Meiran N, Soroker N. Basal ganglia play a unique role in task switching within the frontal-subcortical circuits: evidence from patients with focal lesions. *J Cogn Neurosci*. 2008; 20:1079-1093.
- 53 Taniwaki T, Okayama A, Yoshiura T, et al. Reappraisal of the motor role of basal ganglia: a functional magnetic resonance image study. *J Neurosci*. 2003;23:3432-3438.
- 54 Brown P, Marsden CD. What do the basal ganglia do? *Lancet*. 1998;351(9118):1801-1804.
- 55 Wright WG, Gurfinkel VS, Nutt JG, et al. Axial hypertonicity in Parkinson's disease: direct measurements of trunk and hip torque. *Exp Neurol*. 2007;208:38-46.
- 56 Burleigh A, Horak FB, Nutt JG, Frank JS. Levodopa reduces muscle tone and lower extremity tremor in Parkinson's disease. *Can J Neurol Sci*. 1995;22:280-285.
- 57 Mak MK, Wong EC, Hui-Chan CW. Quantitative measurement of trunk rigidity in parkinsonian patients. *J Neurol*. 2007;254:202-209.
- 58 Jacobs JV, Dimitrova DM, Nutt JG, Horak FB. Can stooped posture explain multidirectional postural instability in patients with Parkinson's disease? *Exp Brain Res*. 2005;166:78-88.
- 59 Schenkman ML, Morey M, Kuchibhatla M. Spinal flexibility and balance control among community-dwelling adults with and without Parkinson's disease. *J Gerontol A Biol Sci Med Sci*. 2000;55:M441-M445.
- 60 Schenkman ML, Clark K, Xie T, et al. Spinal movement and performance of a standing reach task in participants with and without Parkinson disease. *Phys Ther*. 2001;81:1400-1411.
- 61 Dimitrova D, Horak FB, Nutt JG. Postural muscle responses to multidirectional translations in patients with Parkinson's disease. *J Neurophysiol*. 2004;91:489-501.
- 62 Vaugoyeau M, Viallet F, Aurenry R, et al. Axial rotation in Parkinson's disease. *J Neurol Neurosurg Psychiatry*. 2006;77:815-821.
- 63 Schenkman ML, Cutson TM, Kuchibhatla M, et al. Exercise to improve spinal flexibility and function for people with Parkinson's disease: a randomized, controlled trial. *J Am Geriatr Soc*. 1998;46:1207-1216.
- 64 Horak FB, Dimitrova D, Nutt JG. Direction-specific postural instability in subjects with Parkinson's disease. *Exp Neurol*. 2005;193:504-521.
- 65 Frank JS, Horak FB, Nutt JG. Centrally initiated postural adjustments in parkinsonian patients on and off levodopa. *J Neurophysiol*. 2000;84:2440-2448.
- 66 Burleigh-Jacobs A, Horak FB, Nutt JG, Obeso JA. Step initiation in Parkinson's disease: influence of levodopa and external sensory triggers. *Mov Disord*. 1997;12:206-215.
- 67 King LA, Horak FB. Lateral stepping for postural correction in Parkinson's disease. *Arch Phys Med Rehabil*. 2008;89:492-499.
- 68 Mancini M, Rocchi L, Horak FB, Chiari L. Effects of Parkinson's disease and levodopa on functional limits of stability. *Clin Biomech (Bristol, Avon)*. 2008;23:450-458.
- 69 Rocchi L, Chiari L, Mancini M, et al. Step initiation in Parkinson's disease: influence of initial stance conditions. *Neurosci Lett*. 2006;406:128-132.
- 70 Mak MK, Patla A, Hui-Chan C. Sudden turn during walking is impaired in people with Parkinson's disease. *Exp Brain Res*. 2008;190:43-51.
- 71 Pfann KD, Buchman AS, Comella CL, Corcos DM. Control of movement distance in Parkinson's disease. *Mov Disord*. 2001;16:1048-1065.
- 72 Farley BG, Sherman S, Koshland GF. Shoulder muscle activity in Parkinson's disease during multijoint arm movements across a range of speeds. *Exp Brain Res*. 2004;154:160-175.
- 73 Glendinning DS, Enoka RM. Motor unit behavior in Parkinson's disease. *Phys Ther*. 1994;74:61-70.
- 74 Salenius S, Avikainen S, Kaakkola S, et al. Defective cortical drive to muscles in Parkinson's disease and its improvements with levodopa. *Brain*. 2002;125:491-500.
- 75 Yanagawa S, Shindo M, Yanagisawa N. *Muscular Weakness in Parkinson's Disease*. Vol. 53. New York, NY: Raven Press; 1990.
- 76 Giladi N, Kao R, Fahn S. Freezing phenomenon in patients with parkinsonian syndromes. *Mov Disord*. 1997;12:302-305.
- 77 Bloem BR, Hausdorff JM, Visser JE, Giladi N. Falls and freezing of gait in Parkinson's disease: a review of two interconnected, episodic phenomena. *Mov Disord*. 2004;19:871-884.
- 78 Giladi N, McDermott MP, Fahn S, et al. Freezing of gait in PD: prospective assessment in the DATATOP cohort. *Neurology*. 2001;56:1712-1721.
- 79 Giladi N, Hausdorff JM. The role of mental function in the pathogenesis of freezing of gait in Parkinson's disease. *J Neurol Sci*. 2006;248:173-176.
- 80 Jacobs JV, Horak FB. External postural perturbations induce multiple anticipatory postural adjustments when subjects cannot pre-select their stepping foot. *Exp Brain Res*. 2007;179:29-42.
- 81 Chong RKY, Jones CL, Horak FB. Postural set for balance control is normal in Alzheimer's but not in Parkinson's Disease. *J Gerontol A Biol Sci Med Sci*. 1999;54: M129-M135.
- 82 Tunik E, Feldman AG, Poizner H. Dopamine replacement therapy does not restore the ability of Parkinsonian patients to make rapid adjustments in motor strategies according to changing sensorimotor contexts. *Parkinsonism Relat Disord*. 2007;13:425-433.
- 83 Horak FB, Nutt JG, Nashner LM. Postural inflexibility in parkinsonian subjects. *J Neurol Sci*. 1992;111:46-58.
- 84 Steiger MJ, Thompson PD, Marsden CD. Disordered axial movement in Parkinson's disease. *J Neurol Neurosurg Psychiatry*. 1996;61:645-648.
- 85 Brown RG, Marsden CD. Dual-task performance and processing resources in normal subjects and patients with Parkinson's disease. *Brain*. 1991;114(pt 1A):215-231.
- 86 Bloem BR, Grimbergen YA, van Dijk JG, Munneke M. The "posture second" strategy: a review of wrong priorities in Parkinson's disease. *J Neurol Sci*. 2006;248:196-204.
- 87 DeLong MR. The neurophysiologic basis of abnormal movement in basal ganglia disorders. *Neurobehav Toxicol Teratol*. 1983;5:811-816.
- 88 Lidsky T, Manetto C, Schneider J. A consideration of sensory factors involved in motor functions of the basal ganglia. *Brain Res*. 1985;356:133-146.
- 89 Snider SR, Isgreen WP, Cote LJ. Primary sensory systems in Parkinsonism. *Neurology*. 1976;26:423-429.
- 90 Diamond SG, Schneider JS, Markham CH. Oral sensorimotor defects in patients with Parkinson's disease. *Adv Neurol*. 1986;45:335-338.
- 91 Jobst EE, Melnick ME, Byl NN, et al. Sensory perception in Parkinson's disease. *Arch Neurol*. 1997;54:450-454.
- 92 Zia S, Cody FWJ, O'Boyle DJ. Disturbance of human joint position sense in Parkinson's disease. *J Physiol*. 1997;504:117-118.
- 93 Zia S, Cody FWJ, O'Boyle DJ. Impairment of discrimination of bilateral differences in the loci of tactile stimuli in Parkinson's disease. *J Physiol*. 1998;509:180-181.
- 94 Klockgether T, Borutta M, Rapp H, et al. A defect of kinesthesia in Parkinson's disease. *Mov Disord*. 1995;10:460-465.
- 95 O'Sullivan SB, Schmitz TJ. *Physical Rehabilitation: Assessment and Treatment*. Philadelphia: FA Davis Company; 1994.
- 96 Lundin-Olsson L, Nyberg L, Gustafson Y. "Stops walking when talking" as a predictor of falls in elderly people. *Lancet*. 1997;349(9052):617.
- 97 Marchese R, Bove M, Abbruzzese G. Effect of cognitive and motor tasks on postural stability in Parkinson's disease: a posturographic study. *Mov Disord*. 2003;18:652-658.
